# Supplementary material
Source: PubMed Central journal article supplement (PMC4618710)
Supplement: NIHMS724491-supplement-Online_supplements.pdf [file NIHMS724491-supplement-Online_supplements.pdf]

## Online supplement

### **Fibronectin splicing variants containing extra domain A promote atherosclerosis in mice through Toll-like receptor 4**

Prakash Doddapattar,<sup>1§</sup> Chintan Gandhi,<sup>1§#</sup> Prem Prakash,<sup>1</sup> Nirav Dhanesha,<sup>1</sup> Isabella M. Grumbach,<sup>1</sup> Michael E. Dailey,<sup>2</sup> Steven R. Lentz,<sup>1</sup> and Anil K. Chauhan<sup>1</sup>

<sup>1</sup>Department of Internal Medicine, and <sup>2</sup>Department of Biology,  
University of Iowa, Iowa City, IA.

#Current address: Center for Vascular and Inflammatory Diseases, School of Medicine,  
University of Maryland, Baltimore-MD

§These authors contributed equally to the article

**Supplementary Table I.** Plasma cellular EDA<sup>+</sup>-FN concentrations were measured from each mouse using sandwich ELISA. Value are expressed as mean ± SEM. N= 8-10 mice/group.

| Mice strains                                           | Plasma cellular EDA <sup>+</sup> -FN (µg/mL) |                                   |                                                                                |
|--------------------------------------------------------|----------------------------------------------|-----------------------------------|--------------------------------------------------------------------------------|
|                                                        | 6 weeks on chow diet                         | 14 weeks on high fat Western diet | <i>P</i> value                                                                 |
| <i>EDA</i> <sup>-/-</sup> <i>Apoe</i> <sup>-/-</sup>   | 0                                            | 0                                 |                                                                                |
| <i>Apoe</i> <sup>-/-</sup>                             | 1.5 ± 0.3*                                   | 5.8 ± 1.1*                        | * <i>P</i> <0.05 versus <i>EDA</i> <sup>-/-</sup> / <i>Apoe</i> <sup>-/-</sup> |
| <i>EDA</i> <sup>fl/fl</sup> <i>Apoe</i> <sup>-/-</sup> | 4.7 ± 0.6 <sup>#</sup>                       | 9.1 ± 0.8 <sup>#</sup>            | <sup>#</sup> <i>P</i> <0.01 versus <i>Apoe</i> <sup>-/-</sup>                  |

**Supplementary Table II.** Complete Blood Counts from 8- 9 weeks old female mice. Value are expressed as mean ± SEM. N= 8-10 mice/group. *P*= Non significant versus control *Apoe*<sup>-/-</sup> mice.

|                                   | <i>EDA</i> <sup>-/-</sup> <i>Apoe</i> <sup>-/-</sup> | <i>Apoe</i> <sup>-/-</sup> | <i>EDA</i> <sup>fl/fl</sup> <i>Apoe</i> <sup>-/-</sup> |
|-----------------------------------|------------------------------------------------------|----------------------------|--------------------------------------------------------|
| WBC (10 <sup>3</sup> /µl)         | 11.0 ± 0.7                                           | 9.65 ± 0.41                | 10.9 ± 0.9                                             |
| RBC (10 <sup>6</sup> /µl)         | 8.8 ± 0.1                                            | 8.87 ± 0.18                | 9.1 ± 0.1                                              |
| HGB (g/dL)                        | 14.0 ± 0.2                                           | 14.0 ± 0.23                | 14.2 ± 0.1                                             |
| HCT (%)                           | 44.5 ± 0.4                                           | 44.4 ± 0.74                | 44.1 ± 0.3                                             |
| Platelet (10 <sup>3</sup> /µl)    | 1009 ± 75                                            | 1014 ± 83                  | 936 ± 33                                               |
| Neutrophil (10 <sup>3</sup> /µl)  | 0.8 ± 0.04                                           | 0.96 ± 0.12                | 0.7 ± 0.08                                             |
| Lymphocytes (10 <sup>3</sup> /µl) | 9.6 ± 0.64                                           | 8.0 ± 0.37                 | 9.6 ± 0.82                                             |
| Monocytes (10 <sup>3</sup> /µl)   | 0.3 ± 0.05                                           | 0.31 ± 0.06                | 0.3 ± 0.02                                             |
| Eosinophils (10 <sup>3</sup> /µl) | 0.2 ± 0.04                                           | 0.39 ± 0.05                | 0.3 ± 0.04                                             |
| Basophils (10 <sup>3</sup> /µl)   | 0.005 ± 0.003                                        | 0.005 ± 0.003              | 0.008 ± 0.003                                          |

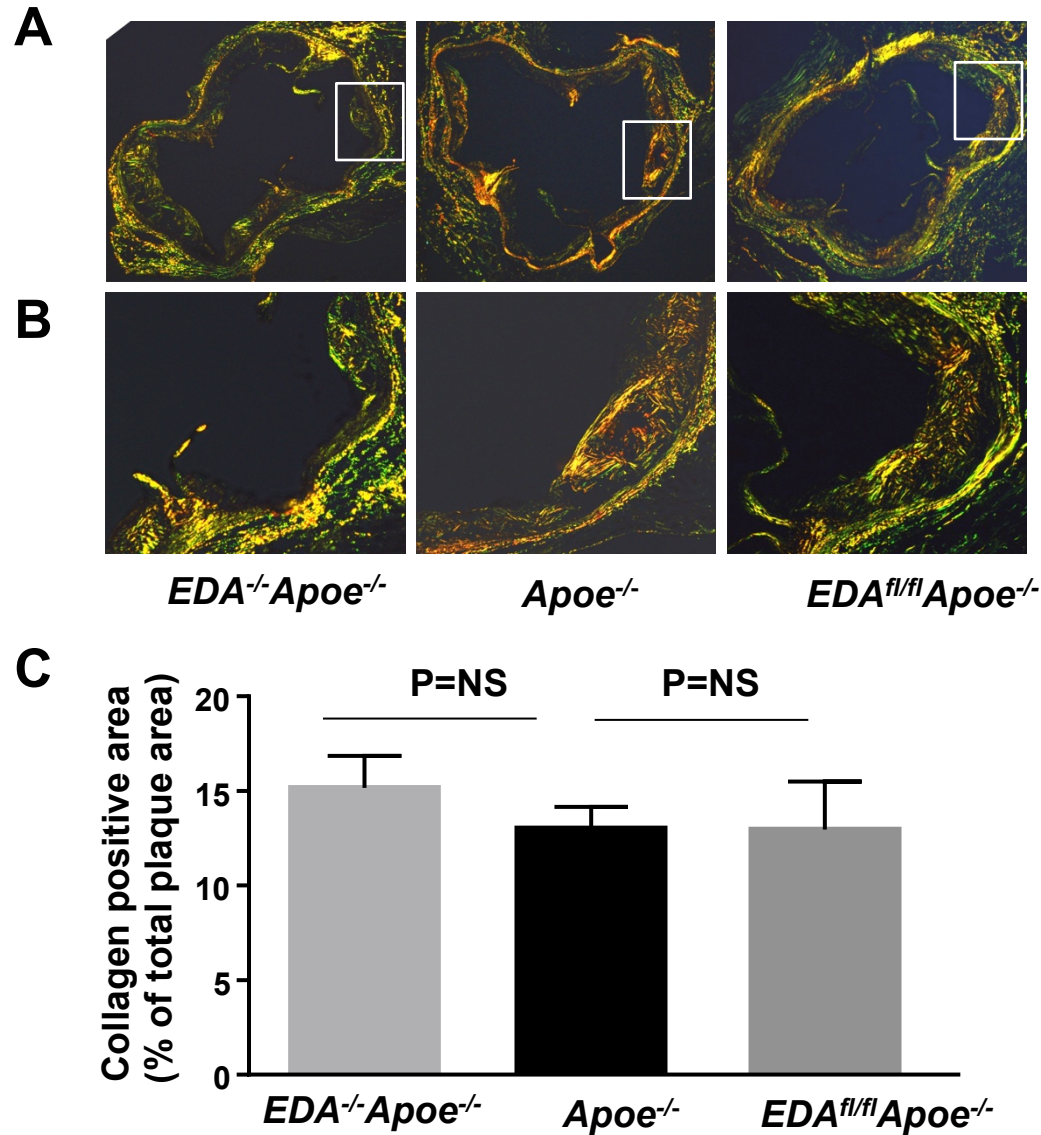

**Supplementary Figure I. Collagen staining in aortic sinus.** **A.** Representative low magnification (4X) photomicrographs stained for collagen as visualized by polarization microscope. **B.** Representative high magnification (10X) photomicrographs of the boxed region (A) stained for collagen. **C.** Quantification of collagen positive area. Data is presented as mean  $\pm$  SEM. N = 5-6 mice/group.

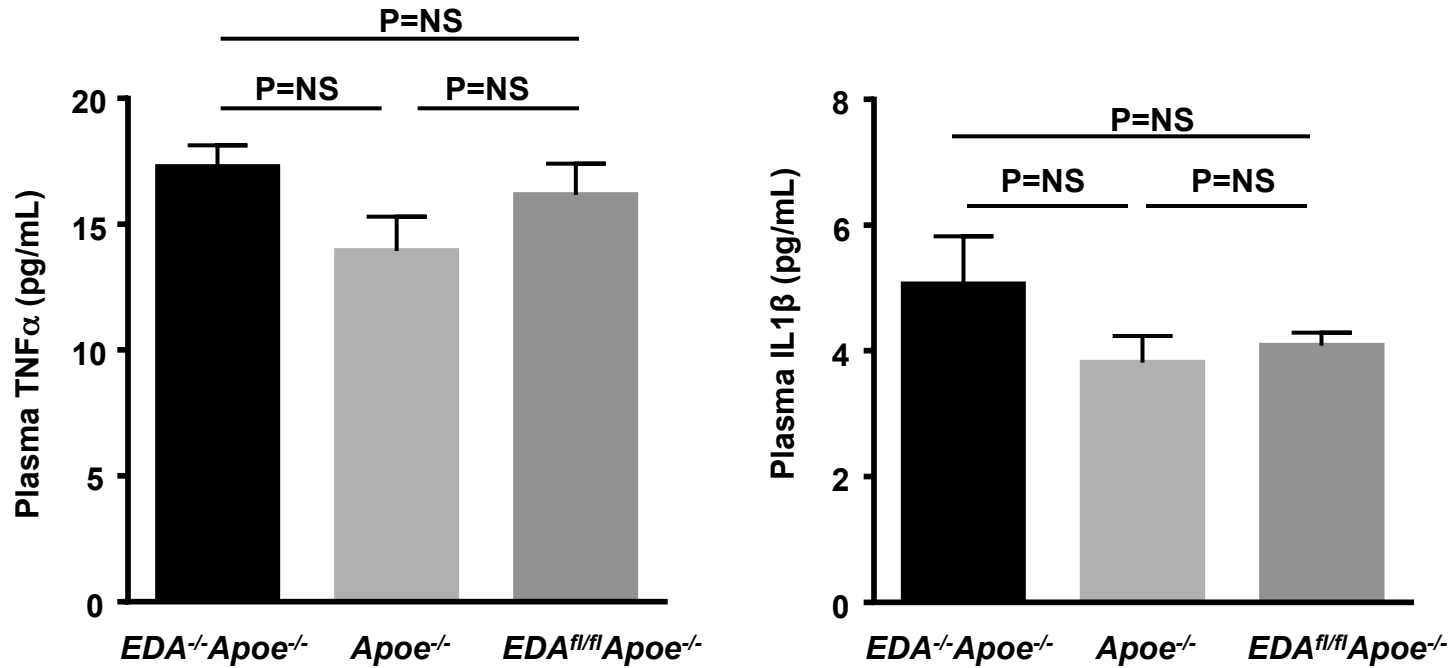

**Supplementary Figure II. Plasma TNF- $\alpha$  and IL-1 $\beta$  levels.** ELISA quantification of TNF- $\alpha$  and IL-1 $\beta$  in plasma from female *EDA*<sup>-/-</sup>*Apoe*<sup>-/-</sup>, *EDA*<sup>fl/fl</sup>*Apoe*<sup>-/-</sup>, and control *Apoe*<sup>-/-</sup> mice fed a high-fat Western diet for 14 weeks. Data is presented as mean  $\pm$  SEM. N = 10/group.

## Supplementary Figure III

acLDL uptake by macrophages from *EDA<sup>-/-</sup>ApoE<sup>-/-</sup>* mice, 24 hours

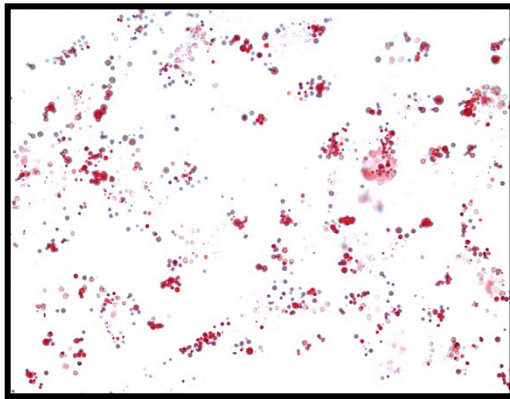

acLDL

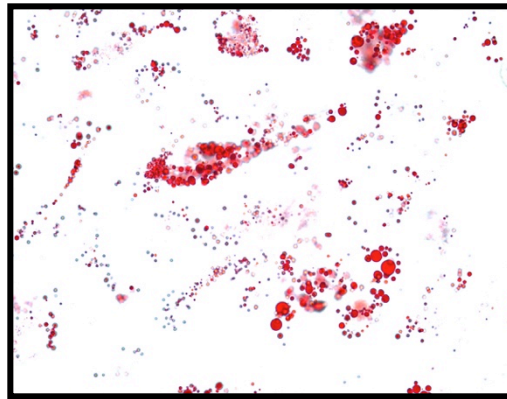

acLDL + cFN

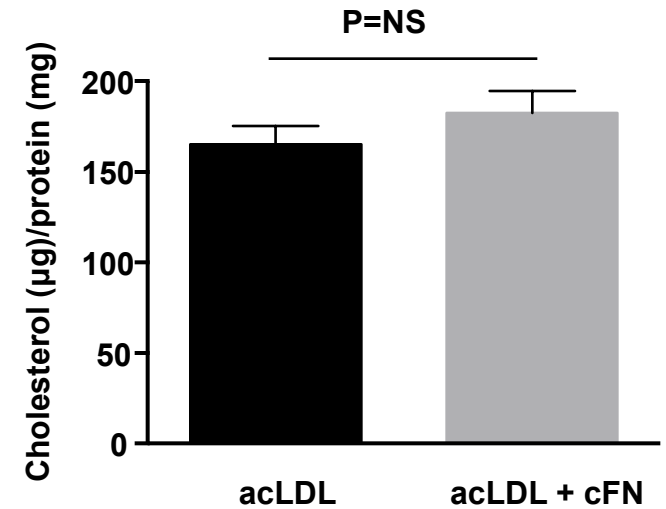

**Supplementary Figure III.** Left panel shows staining of purified bone marrow-derived macrophages from female *EDA<sup>-/-</sup>ApoE<sup>-/-</sup>* mice with Oil Red O 24 hour after incubating them with acLDL with or without exogenous cFN. Right panel shows quantification of total cholesterol. Values are mean  $\pm$  SEM. N=6 mice/group. NS= non significant.

# Supplementary Figure IV

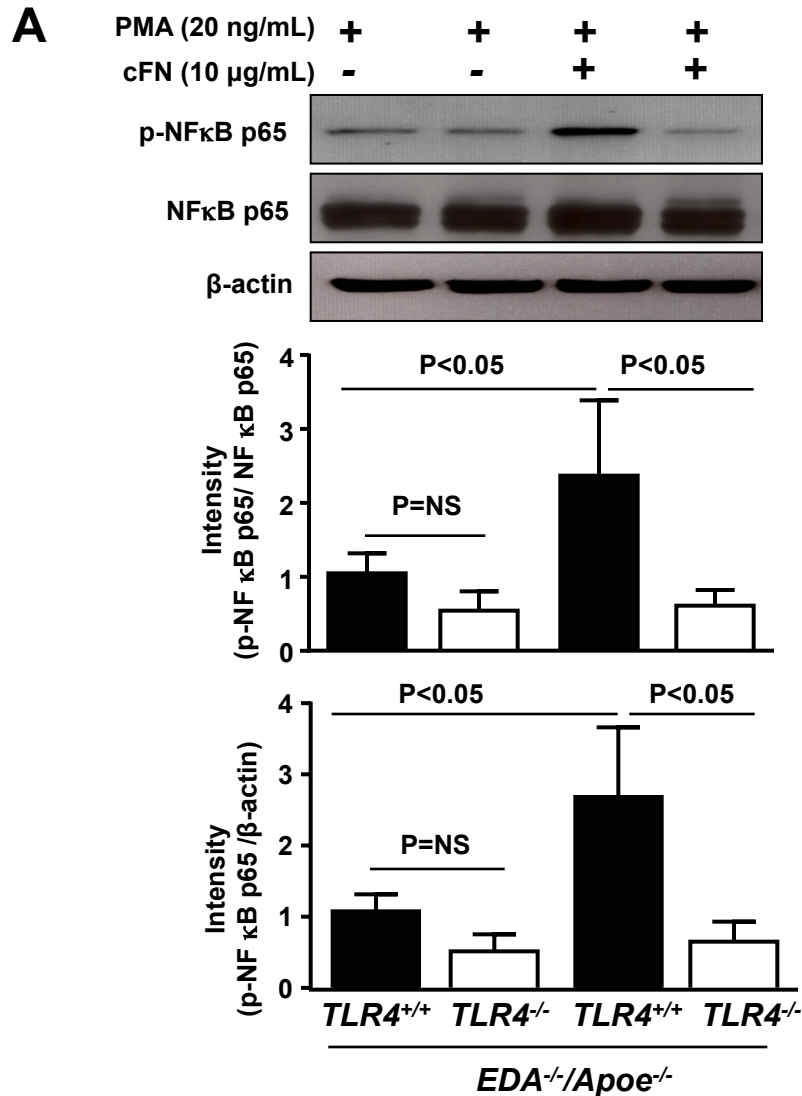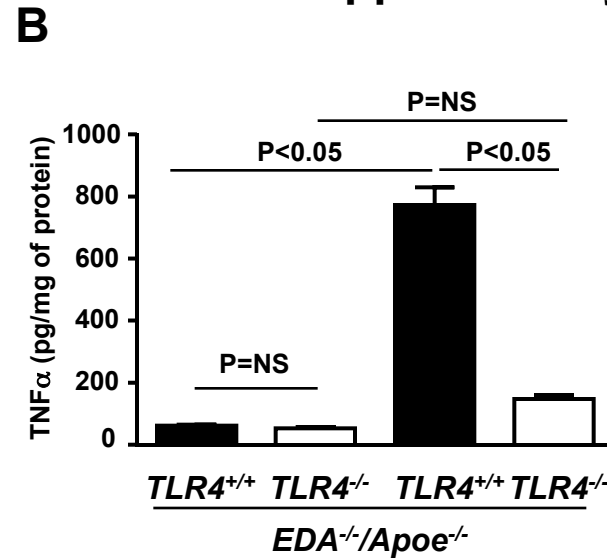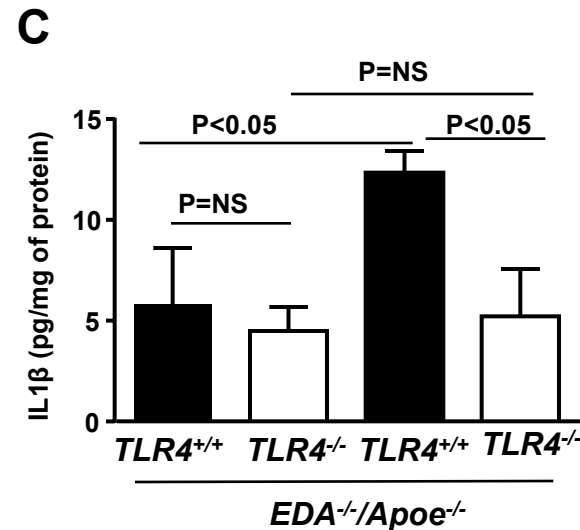

**Supplementary Figure IV. Cellular FN promotes inflammation in macrophages through TLR4.** Bone marrow-derived macrophages from *EDA*<sup>-/-</sup>*Apoe*<sup>-/-</sup> and *EDA*<sup>-/-</sup>*TLR4*<sup>-/-</sup>*Apoe*<sup>-/-</sup> were stimulated with 20 ng/mL of phorbol myristate acetate in presence or absence of cFN (10 $\mu$ g/mL) for 24 hours. **A.** Representative immunoblots in top panel shows expression of phosphorylated- NF $\kappa$ B p65, total NF $\kappa$ B p65 and  $\beta$ -actin. Bar diagram in middle and bottom panels represent quantification.  $\beta$ -actin was used as loading control. N = 4 mice/group. **B&C.** ELISA quantification of TNF- $\alpha$  and IL-1 $\beta$  in supernatant medium from cFN treated and untreated macrophages. Data is presented as mean  $\pm$  SEM. N = 4 mice/group.
